# Supplementary material
Source: Springer Nature journal article supplement (https://www.springermedizin.de/resource/supplementary/12958_2013_1093_MOESM4_ESM.pdf/9566786)

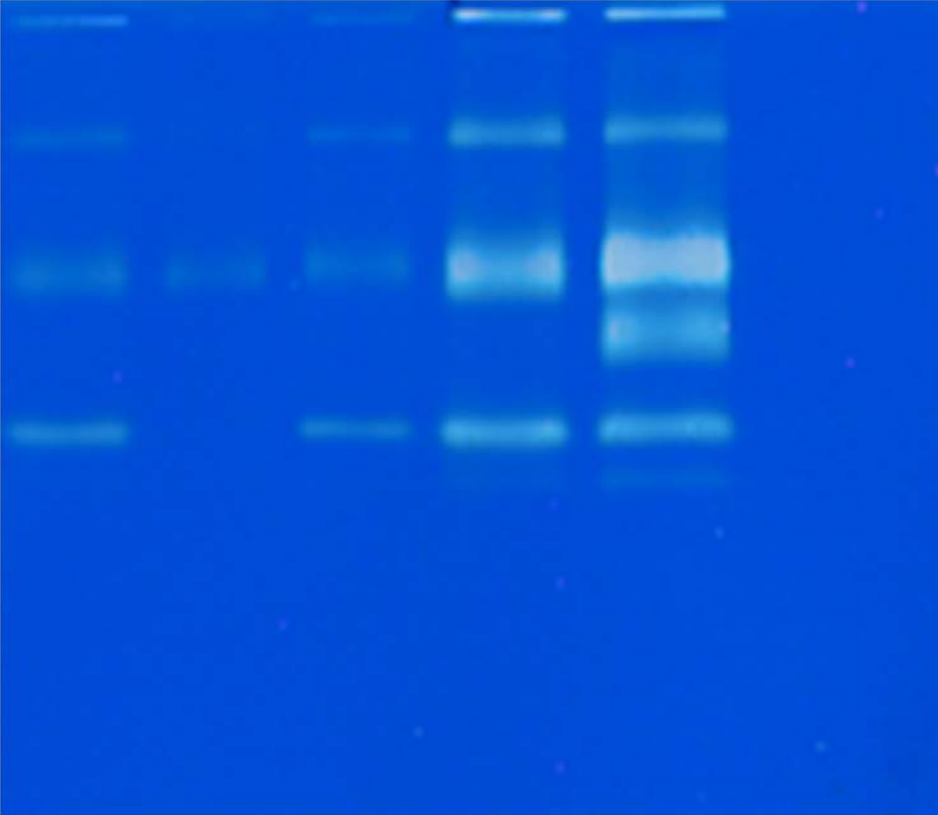

← dimericMMP-9 (180kDa)

← proMMP-9 (92kDa)

← activeMMP-9 (87kDa)

← proMMP-2 (72kDa)

← activeMMP-2 (66kDa)

1

2

3

4

5

6

Supplement: MOESM4 [file 9566786]
